# Supplementary material for: Challenges of Changing Water Sources for Human Wellbeing in the Arctic Zone of Western Siberia
Source: MDPI journal article supplement (doi:10.3390/w15081577), 2023-04-18
Supplement: s1 [file s1]

Archive with 2 entries (2 files):
- Supplementary material S1.pdf
- Supplementary material S2.pdf
